# Supplementary material for: Spatial variations, origins, and risk assessments of polycyclicaromatic hydrocarbons in French soils
Source: Copernicus journal article supplement (doi:10.5194/soil-2021-6), 2021-02-01
Supplement: Supplementary file [file soil-2021-6-AC1-supplement.pdf]

Please consider adding the information on QA/QC, namely which reference material(s) were used for PAHs

We added the values of the reference material used to validate the results in the Supplementary Material as Table S1. A sentence about the reference material has been added lines 136 to 137.

Figure S1 and S6 – please consider adding geographical coordinates to the map

Figure 1-4: the same as above

Longitude and latitude has been added to the all the maps (Figure 1 to 4, S1 and S6).

Line 104: you mentioned 16 PAHs measured, however you discuss only 15 of them (sum of 15) in your work. Please clarify better in the text why you only used 15 PAHs for discussion of the results

Sixteen PAHs were measured in soils. However, concentrations of acenaphtylene could not be validated given the value of  $0 \text{ mg.kg}^{-1}$  for this compound in the reference material. Therefore, this PAH compound was not considered in the paper resulting in the use of 15PAHs in the discussion. Nevertheless, acenaphtylene was quantified in less than 1% of the 2154 soil samples and do not significantly modify the results. This explanation was added to the manuscript lines 137 to 140.
